# Supplementary material for: De SaP (Symptomen en Percepties)-vragenlijst: een valide instrument voor gezondheidsonderzoek bij rampen en milieudreigingen
Source: Springer Nature journal article supplement (doi:10.1007/s12508-023-00413-x), 2023-10-19
Supplement: MOESM3 [file 26205714]

De volgende vragen gaan over de gezondheidsklacht uit de vorige vragen (1-28), waar u het meest last van had. Mocht u nu geen klachten (meer) hebben, dan kunt u de vragen a – k overslaan.

**a. Wat is uw belangrijkste klacht?**

(Vul hier het bijbehorende cijfer van de klachten 1-28 in)

Ik heb geen klachten ► **EINDE LIJST**

**b. Hoeveel invloed heeft deze klacht op uw leven? Kruis het hokje aan onder het getal van 0-10 dat uw mening het beste weergeeft.**

|                          |                          |                          |                          |                          |                          |                          |                          |                          |                          |                          |           |
|--------------------------|--------------------------|--------------------------|--------------------------|--------------------------|--------------------------|--------------------------|--------------------------|--------------------------|--------------------------|--------------------------|-----------|
| Helemaal niet            | ↔                        |                          |                          |                          |                          |                          |                          |                          |                          |                          | Zeer veel |
| 0                        | 1                        | 2                        | 3                        | 4                        | 5                        | 6                        | 7                        | 8                        | 9                        | 10                       |           |
| <input type="checkbox"/> |           |

**c. Hoe lang denkt u dat deze klacht zal duren?**

|                          |                          |                          |                          |                          |                          |                          |                          |                          |                          |                          |                 |
|--------------------------|--------------------------|--------------------------|--------------------------|--------------------------|--------------------------|--------------------------|--------------------------|--------------------------|--------------------------|--------------------------|-----------------|
| Heel erg kort            | ↔                        |                          |                          |                          |                          |                          |                          |                          |                          |                          | Mijn hele leven |
| 0                        | 1                        | 2                        | 3                        | 4                        | 5                        | 6                        | 7                        | 8                        | 9                        | 10                       |                 |
| <input type="checkbox"/> |                 |

**d. Kunt u zelf iets aan deze klacht doen?**

|                          |                          |                          |                          |                          |                          |                          |                          |                          |                          |                          |               |
|--------------------------|--------------------------|--------------------------|--------------------------|--------------------------|--------------------------|--------------------------|--------------------------|--------------------------|--------------------------|--------------------------|---------------|
| Nee, helemaal niets      | ↔                        |                          |                          |                          |                          |                          |                          |                          |                          |                          | Ja, heel veel |
| 0                        | 1                        | 2                        | 3                        | 4                        | 5                        | 6                        | 7                        | 8                        | 9                        | 10                       |               |
| <input type="checkbox"/> |               |

**e. Krijgt of volgt u op dit moment een behandeling voor uw klacht?**

- Ja ► ga door naar vraag 12f
- Nee ► ga door naar vraag 12g

**f. Helpt deze behandeling bij deze klacht?**

|                          |                          |                          |                          |                          |                          |                          |                          |                          |                          |                          |           |
|--------------------------|--------------------------|--------------------------|--------------------------|--------------------------|--------------------------|--------------------------|--------------------------|--------------------------|--------------------------|--------------------------|-----------|
| Helemaal niet            | ↔                        |                          |                          |                          |                          |                          |                          |                          |                          |                          | Heel veel |
| 0                        | 1                        | 2                        | 3                        | 4                        | 5                        | 6                        | 7                        | 8                        | 9                        | 10                       |           |
| <input type="checkbox"/> |           |

**g. Zou u een behandeling willen voor deze klacht?**

|                          |                          |                          |                          |                          |                          |                          |                          |                          |                          |                          |            |
|--------------------------|--------------------------|--------------------------|--------------------------|--------------------------|--------------------------|--------------------------|--------------------------|--------------------------|--------------------------|--------------------------|------------|
| Helemaal niet            | ↔                        |                          |                          |                          |                          |                          |                          |                          |                          |                          | Heel graag |
| 0                        | 1                        | 2                        | 3                        | 4                        | 5                        | 6                        | 7                        | 8                        | 9                        | 10                       |            |
| <input type="checkbox"/> |            |

**h. In hoeverre bent u bezorgd over deze klacht?**

|                          |                          |                          |                          |                          |                          |                          |                          |                          |                          |                          |          |
|--------------------------|--------------------------|--------------------------|--------------------------|--------------------------|--------------------------|--------------------------|--------------------------|--------------------------|--------------------------|--------------------------|----------|
| Helemaal niet            | ↔                        |                          |                          |                          |                          |                          |                          |                          |                          |                          | Heel erg |
| 0                        | 1                        | 2                        | 3                        | 4                        | 5                        | 6                        | 7                        | 8                        | 9                        | 10                       |          |
| <input type="checkbox"/> |          |

**i. In hoeverre begrijpt u waarom u deze klacht heeft?**

|                          |                          |                          |                          |                          |                          |                          |                          |                          |                          |                          |                     |
|--------------------------|--------------------------|--------------------------|--------------------------|--------------------------|--------------------------|--------------------------|--------------------------|--------------------------|--------------------------|--------------------------|---------------------|
| Begrijp 't helemaal niet | ↔                        |                          |                          |                          |                          |                          |                          |                          |                          |                          | Begrijp 't helemaal |
| 0                        | 1                        | 2                        | 3                        | 4                        | 5                        | 6                        | 7                        | 8                        | 9                        | 10                       |                     |
| <input type="checkbox"/> |                     |

**j. In hoeverre heeft uw klacht invloed op uw gemoedstoestand? (bijvoorbeeld: boos, angstig, somber of van slag)**

|                          |                          |                          |                          |                          |                          |                          |                          |                          |                          |                          |                   |
|--------------------------|--------------------------|--------------------------|--------------------------|--------------------------|--------------------------|--------------------------|--------------------------|--------------------------|--------------------------|--------------------------|-------------------|
| Helemaal geen invloed    | ↔                        |                          |                          |                          |                          |                          |                          |                          |                          |                          | Heel veel invloed |
| 0                        | 1                        | 2                        | 3                        | 4                        | 5                        | 6                        | 7                        | 8                        | 9                        | 10                       |                   |
| <input type="checkbox"/> |                   |

**k. Wat zijn volgens u de oorzaken van deze belangrijkste gezondheidsklacht?**
